# Supplementary material
Source: PubMed Central journal article supplement (PMC5930322)
Supplement: AEM.02166-17_zam009188484s1.pdf [file AEM.02166-17_zam009188484s1.pdf]

1                   **FISH-SIMS imaging of an autotrophic, nitrate-reducing,**  
2                   **Fe(II)-oxidizing enrichment culture provides insights into carbon**  
3                   **metabolism**

4                   Claudia Tominski<sup>a</sup>, Tina Lösekann-Behrens<sup>b</sup>, Alexander Ruecker<sup>c</sup>, Nikolas Hagemann<sup>a,d</sup>, Sara  
5                   Kleindienst<sup>a</sup>, Carsten W. Mueller<sup>e</sup>, Carmen Höschen<sup>e</sup>, Ingrid Kögel-Knabner<sup>e</sup>, Andreas Kappler<sup>a</sup> and  
6                   Sebastian Behrens<sup>b,f,\*</sup>  
7

8                   <sup>a</sup> Geomicrobiology, Center for Applied Geoscience, University of Tuebingen, Germany

9                   <sup>b</sup> BioTechnology Institute, University of Minnesota, St. Paul, MN, USA

10                  <sup>c</sup> Biogeochemistry and Environmental Quality Research Group, Clemson University, Georgetown, SC, USA

11                  <sup>d</sup> Environmental Analytics, Agroscope, Zurich, Switzerland

12                  <sup>e</sup> Chair of Soil Science, Technical University of Munich, Freising, Germany

13                  <sup>f</sup> Department of Civil, Environmental, and Geo- Engineering, University of Minnesota, Minneapolis, MN, USA  
14  
15

16  
17                   **SUPPLEMENTARY INFORMATION**  
18  
19  
20  
21  
22  
23

24                  \*Corresponding author:

25                  Sebastian F. Behrens

26                  University of Minnesota

27                  Department of Civil, Environmental, and Geo- Engineering

28                  Civil Engineering Building, Room #244

29                  500 Pillsbury Drive S.E.

30                  Minneapolis, MN 55455-0116, USA

31                  Phone: 651-756-9359

32

33                  e-mail: sbehrens@umn.edu

34 **Tab. S1:** Raw counts and calculated enrichments of *Gallionellaceae* sp. and *Bradyrhizobium* spp. cells under both autotrophic and heterotrophic growth conditions  
 35 measured by nanoSIMS.

| Growth phase                                                      | <sup>12</sup> C | <sup>13</sup> C | <sup>14</sup> N | <sup>15</sup> N | <sup>56</sup> Fe <sup>16</sup> O | <sup>13</sup> C/ <sup>12</sup> C<br>[% APE] | <sup>15</sup> N/ <sup>14</sup> N<br>[% APE] | <sup>13</sup> C/ <sup>15</sup> N<br>[% APE] | cell<br>volume | <sup>13</sup> C/ <sup>15</sup> N normalized to cell<br>volume [% APE] |
|-------------------------------------------------------------------|-----------------|-----------------|-----------------|-----------------|----------------------------------|---------------------------------------------|---------------------------------------------|---------------------------------------------|----------------|-----------------------------------------------------------------------|
| <b><i>Gallionellaceae</i> sp. – autotrophic growth conditions</b> |                 |                 |                 |                 |                                  |                                             |                                             |                                             |                |                                                                       |
| <b>exponential</b>                                                | 1.14E+10        | 3.68E+08        | 1.66E+11        | 4.61E+09        | 2.42E+10                         | 3.23                                        | 2.78                                        | 7.99                                        | 0.35           | 22.82                                                                 |
|                                                                   | 8.13E+10        | 7.64E+08        | 8.63E+11        | 1.85E+09        | 6.75E+09                         | 0.94                                        | 0.21                                        | 41.20                                       | 0.35           | 117.73                                                                |
|                                                                   | 1.23E+10        | 1.81E+08        | 7.07E+10        | 9.43E+08        | 1.67E+10                         | 1.47                                        | 1.33                                        | 19.20                                       | 0.35           | 54.85                                                                 |
|                                                                   | 3.39E+09        | 5.90E+07        | 4.42E+10        | 6.93E+08        | 1.42E+10                         | 1.74                                        | 1.57                                        | 8.52                                        | 0.35           | 24.34                                                                 |
|                                                                   | 3.64E+09        | 6.70E+07        | 7.34E+10        | 1.31E+09        | 1.40E+10                         | 1.84                                        | 1.79                                        | 5.11                                        | 0.35           | 14.59                                                                 |
|                                                                   | 1.75E+10        | 2.54E+08        | 2.09E+11        | 2.38E+09        | 3.65E+10                         | 1.46                                        | 1.14                                        | 10.68                                       | 0.35           | 30.51                                                                 |
|                                                                   | 4.89E+09        | 5.10E+07        | 1.04E+11        | 3.13E+08        | 8.14E+09                         | 1.04                                        | 0.30                                        | 16.28                                       | 0.35           | 46.53                                                                 |
|                                                                   | 4.40E+09        | 9.20E+07        | 8.21E+10        | 1.33E+09        | 7.82E+09                         | 2.09                                        | 1.62                                        | 6.92                                        | 0.35           | 19.76                                                                 |
|                                                                   | 5.94E+09        | 1.30E+08        | 1.06E+11        | 1.60E+09        | 1.15E+10                         | 2.19                                        | 1.50                                        | 8.15                                        | 0.35           | 23.27                                                                 |
| 2.90E+09                                                          | 6.90E+07        | 6.14E+10        | 1.08E+09        | 1.33E+10        | 2.38                             | 1.77                                        | 6.37                                        | 0.35                                        | 18.20          |                                                                       |
| <b>stationary</b>                                                 | 1.49E+09        | 2.70E+07        | 1.89E+10        | 3.93E+08        | 3.91E+09                         | 1.82                                        | 2.08                                        | 6.86                                        | 0.35           | 19.61                                                                 |
|                                                                   | 7.12E+08        | 3.30E+07        | 1.23E+10        | 6.81E+08        | 4.48E+09                         | 4.63                                        | 5.52                                        | 4.85                                        | 0.35           | 13.84                                                                 |
|                                                                   | 1.49E+10        | 1.66E+08        | 4.28E+11        | 1.29E+09        | 2.73E+10                         | 1.11                                        | 0.30                                        | 12.82                                       | 0.35           | 36.63                                                                 |
|                                                                   | 9.26E+09        | 8.20E+07        | 1.49E+11        | 4.56E+08        | 7.34E+09                         | 0.89                                        | 0.31                                        | 17.98                                       | 0.35           | 51.36                                                                 |
|                                                                   | 1.03E+10        | 3.19E+08        | 2.61E+11        | 7.55E+09        | 3.59E+10                         | 3.08                                        | 2.89                                        | 4.22                                        | 0.35           | 12.07                                                                 |
|                                                                   | 8.06E+09        | 9.40E+07        | 2.15E+11        | 8.29E+08        | 3.27E+10                         | 1.17                                        | 0.39                                        | 11.33                                       | 0.35           | 32.38                                                                 |
|                                                                   | 7.12E+09        | 7.40E+07        | 1.46E+11        | 6.65E+08        | 1.79E+10                         | 1.04                                        | 0.46                                        | 11.12                                       | 0.35           | 31.78                                                                 |
|                                                                   | 7.35E+09        | 5.70E+07        | 1.51E+11        | 5.13E+08        | 2.82E+10                         | 0.78                                        | 0.34                                        | 11.11                                       | 0.35           | 31.74                                                                 |
|                                                                   | 1.15E+10        | 1.76E+08        | 2.58E+11        | 2.99E+09        | 2.63E+10                         | 1.53                                        | 1.16                                        | 5.89                                        | 0.35           | 16.84                                                                 |
|                                                                   | 1.59E+10        | 4.57E+08        | 1.83E+11        | 3.20E+09        | 2.56E+10                         | 2.88                                        | 1.75                                        | 14.28                                       | 0.35           | 40.81                                                                 |
|                                                                   | 2.89E+11        | 7.55E+09        | 9.41E+11        | 5.52E+10        | 1.26E+09                         | 2.61                                        | 5.87                                        | 13.67                                       | 0.35           | 39.05                                                                 |
|                                                                   | 4.38E+09        | 1.36E+08        | 7.76E+10        | 3.06E+09        | 1.71E+10                         | 3.11                                        | 3.95                                        | 4.44                                        | 0.35           | 12.68                                                                 |

|                                                                     |          |          |          |          |          |      |      |        |      |        |
|---------------------------------------------------------------------|----------|----------|----------|----------|----------|------|------|--------|------|--------|
|                                                                     | 3.86E+10 | 1.01E+09 | 1.92E+11 | 7.37E+09 | 9.30E+09 | 2.61 | 3.83 | 13.66  | 0.35 | 39.03  |
|                                                                     | 8.32E+09 | 1.43E+08 | 7.68E+10 | 2.21E+09 | 1.06E+10 | 1.72 | 2.87 | 6.48   | 0.35 | 18.53  |
|                                                                     | 9.92E+09 | 3.93E+08 | 8.18E+10 | 3.08E+09 | 4.49E+09 | 3.96 | 3.77 | 12.75  | 0.35 | 36.42  |
|                                                                     | 3.36E+09 | 7.90E+07 | 9.87E+10 | 2.28E+09 | 1.35E+10 | 2.35 | 2.31 | 3.47   | 0.35 | 9.92   |
|                                                                     | 4.13E+09 | 1.55E+08 | 8.20E+10 | 2.50E+09 | 1.25E+10 | 3.76 | 3.05 | 6.19   | 0.35 | 17.69  |
|                                                                     | 2.09E+09 | 7.30E+07 | 5.87E+10 | 1.98E+09 | 7.88E+09 | 3.50 | 3.37 | 3.69   | 0.35 | 10.55  |
|                                                                     | 7.65E+08 | 1.80E+07 | 1.90E+10 | 4.40E+08 | 3.96E+09 | 2.35 | 2.32 | 4.09   | 0.35 | 11.68  |
|                                                                     | 4.09E+08 | 1.00E+07 | 1.15E+10 | 3.86E+08 | 3.45E+09 | 2.44 | 3.37 | 2.59   | 0.35 | 7.40   |
|                                                                     | 5.79E+10 | 1.16E+09 | 6.43E+11 | 1.33E+10 | 1.25E+11 | 2.01 | 2.07 | 8.72   | 0.35 | 24.92  |
| <b><i>Gallionellaceae</i> sp. – heterotrophic growth conditions</b> |          |          |          |          |          |      |      |        |      |        |
| <b>exponential</b>                                                  | 1.47E+11 | 6.68E+09 | 4.11E+11 | 2.59E+10 | 7.54E+08 | 4.53 | 6.29 | 25.80  | 0.35 | 73.71  |
|                                                                     | 1.31E+12 | 4.79E+10 | 1.82E+12 | 9.89E+10 | 1.70E+07 | 3.66 | 5.43 | 48.46  | 0.35 | 138.47 |
|                                                                     | 2.44E+11 | 1.26E+10 | 8.48E+11 | 4.60E+10 | 7.61E+08 | 5.17 | 5.42 | 27.39  | 0.35 | 78.27  |
|                                                                     | 1.47E+11 | 7.92E+09 | 8.36E+11 | 4.37E+10 | 5.40E+08 | 5.40 | 5.22 | 18.14  | 0.35 | 51.82  |
|                                                                     | 7.07E+10 | 3.50E+09 | 2.61E+11 | 1.79E+10 | 1.50E+07 | 4.95 | 6.88 | 19.50  | 0.35 | 55.71  |
|                                                                     | 1.30E+10 | 6.77E+08 | 8.64E+10 | 5.59E+09 | 1.64E+08 | 5.21 | 6.47 | 12.11  | 0.35 | 34.60  |
|                                                                     | 2.10E+11 | 8.23E+09 | 6.48E+11 | 3.35E+10 | 1.50E+07 | 3.92 | 5.16 | 24.61  | 0.35 | 70.30  |
| <b>stationary</b>                                                   | 1.67E+11 | 1.12E+10 | 4.64E+11 | 3.11E+10 | 5.40E+08 | 6.73 | 6.69 | 36.21  | 0.35 | 103.45 |
|                                                                     | 7.18E+10 | 4.50E+09 | 2.87E+11 | 1.62E+10 | 8.78E+08 | 6.28 | 5.65 | 27.77  | 0.35 | 79.35  |
|                                                                     | 8.05E+10 | 3.52E+09 | 3.45E+11 | 7.94E+09 | 3.05E+08 | 4.38 | 2.30 | 44.37  | 0.35 | 126.78 |
|                                                                     | 2.47E+11 | 1.69E+10 | 1.09E+12 | 5.77E+10 | 1.53E+09 | 6.85 | 5.31 | 29.29  | 0.35 | 83.69  |
|                                                                     | 5.44E+10 | 4.34E+09 | 2.88E+11 | 1.98E+10 | 3.07E+09 | 7.99 | 6.88 | 21.89  | 0.35 | 62.55  |
| <b><i>Bradyrhizobium</i> spp. – autotrophic growth conditions</b>   |          |          |          |          |          |      |      |        |      |        |
| <b>Exponential<br/>(cells ≤1.8 μm)</b>                              | 3.53E+10 | 3.78E+08 | 1.22E+11 | 1.40E+09 | 1.90E+07 | 1.07 | 1.15 | 27.06  | 1.41 | 19.19  |
| <b>Exponential<br/>(cells &gt;1.8 μm)</b>                           | 9.22E+11 | 8.64E+09 | 5.53E+12 | 1.39E+10 | 2.01E+10 | 0.94 | 0.25 | 62.18  | 4.71 | 13.20  |
|                                                                     | 4.51E+10 | 4.33E+08 | 6.96E+10 | 3.32E+08 | 1.69E+09 | 0.96 | 0.48 | 130.45 | 4.71 | 27.70  |
|                                                                     | 7.42E+11 | 7.13E+09 | 5.17E+12 | 1.46E+10 | 1.16E+10 | 0.96 | 0.28 | 48.81  | 4.71 | 10.36  |

|                                                                     |          |          |          |          |          |      |      |        |      |       |
|---------------------------------------------------------------------|----------|----------|----------|----------|----------|------|------|--------|------|-------|
| <b>Stationary</b>                                                   | 1.13E+11 | 1.08E+09 | 6.96E+11 | 2.02E+09 | 1.59E+10 | 0.95 | 0.29 | 53.37  | 1.41 | 37.85 |
| <b>(cells ≤1.8 μm)</b>                                              | 1.30E+10 | 1.46E+08 | 3.46E+10 | 1.44E+08 | 1.80E+07 | 1.12 | 0.42 | 101.38 | 1.41 | 71.90 |
| <b>Stationary</b>                                                   | 2.63E+11 | 2.61E+09 | 1.53E+12 | 4.02E+09 | 2.69E+10 | 0.99 | 0.26 | 64.80  | 4.71 | 13.76 |
| <b>(cells &gt;1.8 μm)</b>                                           | 3.32E+11 | 3.24E+09 | 7.89E+11 | 2.68E+09 | 3.56E+10 | 0.98 | 0.34 | 121.01 | 4.71 | 25.69 |
|                                                                     | 2.85E+11 | 2.80E+09 | 2.34E+12 | 6.21E+09 | 8.22E+09 | 0.98 | 0.27 | 45.13  | 4.71 | 9.58  |
|                                                                     | 1.15E+12 | 1.08E+10 | 1.90E+12 | 6.03E+09 | 8.69E+09 | 0.94 | 0.32 | 178.96 | 4.71 | 38.00 |
|                                                                     | 2.07E+12 | 1.86E+10 | 4.03E+12 | 1.13E+10 | 4.44E+09 | 0.90 | 0.28 | 164.33 | 4.71 | 34.89 |
| <b><i>Bradyrhizobium</i> spp. – heterotrophic growth conditions</b> |          |          |          |          |          |      |      |        |      |       |
| <b>Exponential</b>                                                  | 4.69E+10 | 2.36E+09 | 2.03E+11 | 1.17E+10 | 2.54E+08 | 5.04 | 5.77 | 20.12  | 1.41 | 14.27 |
| <b>(cells ≤1.8 μm)</b>                                              | 4.54E+10 | 2.18E+09 | 1.67E+11 | 9.53E+09 | 1.00E+07 | 4.81 | 5.72 | 22.88  | 1.41 | 16.22 |
|                                                                     | 2.76E+10 | 8.87E+08 | 4.37E+11 | 1.24E+10 | 3.73E+09 | 3.21 | 2.85 | 7.13   | 1.41 | 5.06  |
|                                                                     | 1.23E+10 | 2.55E+08 | 4.29E+11 | 7.78E+09 | 2.62E+09 | 2.08 | 1.81 | 3.28   | 1.41 | 2.33  |
|                                                                     | 8.19E+10 | 4.07E+09 | 1.82E+12 | 6.57E+10 | 9.20E+07 | 4.97 | 3.61 | 6.20   | 1.41 | 4.40  |
| <b>Exponential</b>                                                  | 1.52E+12 | 1.38E+10 | 4.37E+12 | 1.11E+10 | 2.76E+08 | 0.91 | 0.26 | 124.09 | 4.71 | 26.35 |
| <b>(cells &gt;1.8 μm)</b>                                           | 4.28E+11 | 4.00E+09 | 2.72E+12 | 5.83E+09 | 8.90E+07 | 0.93 | 0.21 | 68.61  | 4.71 | 14.57 |
|                                                                     | 1.89E+12 | 1.74E+10 | 7.07E+12 | 1.81E+10 | 8.28E+09 | 0.92 | 0.26 | 96.00  | 4.71 | 20.38 |
|                                                                     | 5.12E+10 | 2.02E+09 | 9.81E+11 | 3.61E+10 | 1.00E+10 | 3.94 | 3.67 | 5.59   | 4.71 | 1.19  |
|                                                                     | 2.98E+11 | 1.45E+10 | 5.01E+12 | 1.77E+11 | 5.95E+09 | 4.87 | 3.54 | 8.16   | 4.71 | 1.73  |
| <b>Stationary</b>                                                   | 1.17E+11 | 6.39E+09 | 3.90E+11 | 2.06E+10 | 2.12E+09 | 5.47 | 5.27 | 31.07  | 1.41 | 22.03 |
| <b>(cells ≤1.8 μm)</b>                                              | 8.76E+10 | 3.97E+09 | 3.60E+11 | 1.45E+10 | 1.49E+09 | 4.54 | 4.02 | 27.46  | 1.41 | 19.47 |
|                                                                     | 5.71E+10 | 3.19E+09 | 6.01E+11 | 2.05E+10 | 2.81E+09 | 5.58 | 3.42 | 15.53  | 1.41 | 11.01 |
|                                                                     | 4.09E+10 | 1.64E+09 | 1.50E+11 | 5.73E+09 | 6.90E+07 | 4.02 | 3.83 | 28.70  | 1.41 | 20.36 |
|                                                                     | 2.10E+11 | 1.03E+10 | 9.98E+11 | 3.58E+10 | 3.81E+08 | 4.91 | 3.59 | 28.71  | 1.41 | 20.36 |
|                                                                     | 1.05E+11 | 4.71E+09 | 5.36E+11 | 2.23E+10 | 5.59E+09 | 4.50 | 4.16 | 21.11  | 1.41 | 14.97 |
|                                                                     | 1.37E+11 | 6.73E+09 | 4.38E+11 | 2.15E+10 | 3.80E+07 | 4.90 | 4.91 | 31.30  | 1.41 | 22.20 |
|                                                                     | 5.36E+10 | 3.10E+09 | 1.97E+11 | 1.33E+10 | 3.31E+08 | 5.78 | 6.75 | 23.35  | 1.41 | 16.56 |
|                                                                     | 8.02E+10 | 4.17E+09 | 4.69E+11 | 2.62E+10 | 1.23E+09 | 5.20 | 5.58 | 15.94  | 1.41 | 11.30 |
|                                                                     | 2.81E+10 | 1.44E+09 | 1.32E+11 | 8.15E+09 | 3.40E+08 | 5.10 | 6.16 | 17.62  | 1.41 | 12.50 |
|                                                                     | 2.17E+10 | 1.18E+09 | 1.35E+11 | 8.96E+09 | 1.84E+09 | 5.41 | 6.63 | 13.13  | 1.41 | 9.31  |
|                                                                     | 5.29E+10 | 2.96E+09 | 3.94E+11 | 2.06E+10 | 1.42E+08 | 5.60 | 5.22 | 14.43  | 1.41 | 10.23 |

|                           |          |          |          |          |          |      |      |        |      |       |
|---------------------------|----------|----------|----------|----------|----------|------|------|--------|------|-------|
|                           | 1.16E+11 | 6.02E+09 | 5.47E+11 | 2.65E+10 | 3.10E+07 | 5.18 | 4.85 | 22.70  | 1.41 | 16.10 |
|                           | 3.19E+10 | 1.77E+09 | 1.78E+11 | 1.02E+10 | 8.81E+09 | 5.55 | 5.72 | 17.46  | 1.41 | 12.39 |
|                           | 6.39E+10 | 4.38E+09 | 2.38E+11 | 1.36E+10 | 3.57E+08 | 6.86 | 5.71 | 32.23  | 1.41 | 22.86 |
|                           | 1.38E+11 | 6.87E+09 | 8.20E+11 | 3.59E+10 | 1.13E+10 | 4.96 | 4.38 | 19.14  | 1.41 | 13.57 |
|                           | 2.40E+11 | 1.30E+10 | 2.88E+11 | 1.71E+10 | 3.50E+09 | 5.41 | 5.94 | 75.95  | 1.41 | 53.86 |
|                           | 1.77E+11 | 9.82E+09 | 2.73E+11 | 1.61E+10 | 1.72E+08 | 5.56 | 5.89 | 61.09  | 1.41 | 43.33 |
|                           | 5.05E+10 | 2.47E+09 | 1.99E+11 | 1.02E+10 | 3.83E+09 | 4.89 | 5.13 | 24.21  | 1.41 | 17.17 |
|                           | 3.55E+10 | 1.96E+09 | 9.34E+10 | 5.33E+09 | 7.50E+07 | 5.52 | 5.71 | 36.77  | 1.41 | 26.08 |
|                           | 5.17E+10 | 2.54E+09 | 1.17E+11 | 6.93E+09 | 6.10E+07 | 4.90 | 5.93 | 36.60  | 1.41 | 25.95 |
|                           | 2.78E+11 | 1.44E+10 | 5.15E+11 | 2.95E+10 | 7.10E+08 | 5.20 | 5.73 | 49.00  | 1.41 | 34.75 |
|                           | 1.04E+11 | 5.63E+09 | 3.22E+11 | 1.91E+10 | 8.96E+08 | 5.43 | 5.94 | 29.48  | 1.41 | 20.91 |
| <b>Stationary</b>         | 6.54E+10 | 3.68E+09 | 3.20E+11 | 1.94E+10 | 6.46E+08 | 5.62 | 6.05 | 18.99  | 4.71 | 4.03  |
| <b>(cells &gt;1.8 μm)</b> | 1.47E+11 | 8.14E+09 | 4.85E+11 | 2.78E+10 | 3.74E+09 | 5.55 | 5.72 | 29.30  | 4.71 | 6.22  |
|                           | 1.29E+11 | 8.27E+09 | 9.33E+10 | 6.40E+09 | 5.20E+07 | 6.42 | 6.87 | 129.18 | 4.71 | 27.43 |
|                           | 2.96E+11 | 1.56E+10 | 4.40E+11 | 2.43E+10 | 3.10E+07 | 5.27 | 5.53 | 64.07  | 4.71 | 13.60 |
|                           | 3.48E+11 | 1.94E+10 | 9.32E+11 | 4.70E+10 | 6.60E+07 | 5.58 | 5.04 | 41.37  | 4.71 | 8.78  |
|                           | 5.53E+11 | 3.09E+10 | 1.59E+12 | 8.15E+10 | 5.70E+07 | 5.59 | 5.12 | 37.89  | 4.71 | 8.04  |
|                           | 1.72E+11 | 9.29E+09 | 6.14E+11 | 2.87E+10 | 6.08E+09 | 5.39 | 4.67 | 32.43  | 4.71 | 6.88  |
|                           | 1.00E+11 | 6.46E+09 | 4.16E+11 | 2.32E+10 | 2.08E+10 | 6.46 | 5.59 | 27.78  | 4.71 | 5.90  |
|                           | 2.10E+11 | 1.30E+10 | 1.17E+12 | 5.93E+10 | 8.86E+09 | 6.18 | 5.08 | 21.86  | 4.71 | 4.64  |
|                           | 4.39E+11 | 2.78E+10 | 2.90E+12 | 1.35E+11 | 3.16E+10 | 6.32 | 4.66 | 20.58  | 4.71 | 4.37  |
|                           | 1.78E+11 | 1.01E+10 | 1.67E+12 | 5.94E+10 | 3.06E+09 | 5.68 | 3.56 | 17.05  | 4.71 | 3.62  |
|                           | 3.85E+11 | 1.57E+10 | 9.68E+11 | 4.00E+10 | 1.87E+09 | 4.08 | 4.13 | 39.29  | 4.71 | 8.34  |
|                           | 1.48E+11 | 7.88E+09 | 6.49E+11 | 3.26E+10 | 7.90E+07 | 5.34 | 5.02 | 24.21  | 4.71 | 5.14  |
|                           | 2.97E+11 | 1.55E+10 | 2.15E+12 | 7.10E+10 | 1.23E+09 | 5.23 | 3.31 | 21.88  | 4.71 | 4.65  |
|                           | 4.09E+11 | 2.12E+10 | 5.08E+11 | 2.58E+10 | 9.10E+07 | 5.19 | 5.08 | 82.22  | 4.71 | 17.46 |
|                           | 2.25E+11 | 1.09E+10 | 1.19E+12 | 4.48E+10 | 7.18E+08 | 4.86 | 3.76 | 24.42  | 4.71 | 5.18  |
|                           | 3.53E+11 | 1.93E+10 | 9.83E+11 | 4.38E+10 | 4.00E+07 | 5.45 | 4.46 | 43.96  | 4.71 | 9.33  |
|                           | 1.91E+11 | 8.87E+09 | 1.03E+12 | 4.10E+10 | 2.18E+08 | 4.64 | 3.98 | 21.61  | 4.71 | 4.59  |
|                           | 2.61E+11 | 1.74E+10 | 1.73E+12 | 1.04E+11 | 6.36E+08 | 6.69 | 6.02 | 16.78  | 4.71 | 3.56  |

|          |          |          |          |          |      |      |       |      |       |
|----------|----------|----------|----------|----------|------|------|-------|------|-------|
| 3.43E+11 | 2.33E+10 | 1.64E+12 | 9.98E+10 | 5.99E+08 | 6.78 | 6.08 | 23.31 | 4.71 | 4.95  |
| 2.09E+11 | 1.23E+10 | 1.23E+12 | 6.85E+10 | 1.54E+09 | 5.89 | 5.55 | 17.96 | 4.71 | 3.81  |
| 4.36E+11 | 2.78E+10 | 2.31E+12 | 1.19E+11 | 1.82E+09 | 6.38 | 5.15 | 23.38 | 4.71 | 4.96  |
| 1.96E+11 | 1.23E+10 | 9.70E+11 | 5.67E+10 | 5.64E+09 | 6.27 | 5.84 | 21.68 | 4.71 | 4.60  |
| 2.09E+11 | 1.09E+10 | 8.60E+11 | 4.97E+10 | 1.15E+09 | 5.22 | 5.78 | 21.97 | 4.71 | 4.66  |
| 1.81E+11 | 1.21E+10 | 1.08E+12 | 5.97E+10 | 5.60E+08 | 6.70 | 5.53 | 20.32 | 4.71 | 4.32  |
| 2.26E+11 | 1.48E+10 | 1.18E+12 | 6.78E+10 | 2.58E+09 | 6.54 | 5.76 | 21.80 | 4.71 | 4.63  |
| 6.68E+11 | 2.89E+10 | 3.86E+12 | 1.56E+11 | 6.15E+09 | 4.33 | 4.04 | 18.56 | 4.71 | 3.94  |
| 4.19E+11 | 2.35E+10 | 1.27E+12 | 7.08E+10 | 4.71E+09 | 5.62 | 5.56 | 33.24 | 4.71 | 7.06  |
| 7.06E+11 | 4.43E+10 | 2.67E+12 | 1.29E+11 | 1.46E+09 | 6.28 | 4.83 | 34.29 | 4.71 | 7.28  |
| 3.05E+11 | 1.91E+10 | 1.48E+12 | 8.11E+10 | 1.25E+10 | 6.27 | 5.48 | 23.57 | 4.71 | 5.01  |
| 6.80E+11 | 3.88E+10 | 3.60E+12 | 1.58E+11 | 6.16E+09 | 5.71 | 4.38 | 24.61 | 4.71 | 5.23  |
| 6.91E+11 | 4.46E+10 | 2.44E+12 | 1.29E+11 | 1.45E+09 | 6.46 | 5.28 | 34.70 | 4.71 | 7.37  |
| 3.92E+11 | 2.48E+10 | 1.39E+12 | 7.69E+10 | 2.70E+09 | 6.34 | 5.54 | 32.29 | 4.71 | 6.86  |
| 3.20E+11 | 2.19E+10 | 1.24E+12 | 7.34E+10 | 3.48E+09 | 6.85 | 5.94 | 29.83 | 4.71 | 6.33  |
| 1.82E+11 | 9.51E+09 | 7.11E+11 | 3.34E+10 | 2.03E+08 | 5.24 | 4.71 | 28.45 | 4.71 | 6.04  |
| 4.37E+11 | 2.41E+10 | 4.47E+11 | 3.10E+10 | 2.90E+07 | 5.52 | 6.94 | 77.83 | 4.71 | 16.53 |
| 6.82E+11 | 3.93E+10 | 9.61E+11 | 5.74E+10 | 7.35E+09 | 5.76 | 5.98 | 68.38 | 4.71 | 14.52 |
| 1.04E+12 | 6.33E+10 | 1.58E+12 | 9.89E+10 | 6.99E+09 | 6.09 | 6.26 | 63.97 | 4.71 | 13.58 |
| 2.06E+11 | 1.32E+10 | 6.48E+11 | 3.86E+10 | 5.53E+08 | 6.37 | 5.95 | 34.10 | 4.71 | 7.24  |
| 9.58E+11 | 3.89E+10 | 1.96E+12 | 8.14E+10 | 4.52E+09 | 4.06 | 4.16 | 47.75 | 4.71 | 10.14 |
| 2.19E+11 | 1.07E+10 | 4.14E+11 | 2.14E+10 | 1.85E+08 | 4.87 | 5.16 | 49.97 | 4.71 | 10.61 |
| 6.30E+11 | 3.79E+10 | 1.75E+12 | 9.83E+10 | 8.27E+09 | 6.01 | 5.61 | 38.53 | 4.71 | 8.18  |
| 3.10E+11 | 1.94E+10 | 9.97E+11 | 5.50E+10 | 5.37E+09 | 6.25 | 5.51 | 35.28 | 4.71 | 7.49  |
| 2.55E+11 | 1.37E+10 | 5.79E+11 | 3.33E+10 | 3.20E+09 | 5.36 | 5.75 | 41.12 | 4.71 | 8.73  |

---

***Gallionellaceae* sp. – natural enrichment under autotrophic growth conditions**

---

|          |          |          |          |          |      |      |       |      |        |
|----------|----------|----------|----------|----------|------|------|-------|------|--------|
| 8.98E+09 | 9.40E+07 | 6.39E+10 | 1.99E+08 | 4.95E+09 | 1.05 | 0.31 | 47.23 | 0.35 | 134.94 |
| 1.84E+09 | 1.60E+07 | 1.93E+10 | 6.80E+07 | 6.50E+09 | 0.87 | 0.35 | 23.53 | 0.35 | 67.22  |
| 2.04E+09 | 2.50E+07 | 5.34E+10 | 2.30E+08 | 1.19E+10 | 1.23 | 0.43 | 10.87 | 0.35 | 31.04  |
| 6.11E+09 | 5.90E+07 | 2.15E+11 | 6.87E+08 | 1.95E+10 | 0.97 | 0.32 | 8.58  | 0.35 | 24.52  |

|          |          |          |          |          |      |      |        |      |        |
|----------|----------|----------|----------|----------|------|------|--------|------|--------|
| 8.09E+09 | 1.03E+08 | 3.29E+11 | 8.91E+08 | 6.54E+09 | 1.27 | 0.27 | 11.56  | 0.35 | 33.03  |
| 1.07E+10 | 1.08E+08 | 3.20E+11 | 8.48E+08 | 6.95E+09 | 1.01 | 0.27 | 12.74  | 0.35 | 36.39  |
| 4.28E+09 | 4.60E+07 | 2.00E+11 | 6.15E+08 | 1.06E+10 | 1.08 | 0.31 | 7.48   | 0.35 | 21.38  |
| 1.03E+10 | 1.19E+08 | 4.19E+11 | 1.08E+09 | 1.29E+10 | 1.15 | 0.26 | 11.05  | 0.35 | 31.57  |
| 1.48E+10 | 1.30E+08 | 6.88E+10 | 2.44E+08 | 2.77E+09 | 0.88 | 0.35 | 53.27  | 0.35 | 152.20 |
| 1.16E+10 | 1.14E+08 | 3.58E+11 | 8.86E+08 | 8.87E+09 | 0.98 | 0.25 | 12.87  | 0.35 | 36.76  |
| 2.06E+09 | 2.10E+07 | 7.12E+10 | 2.71E+08 | 4.46E+09 | 1.02 | 0.38 | 7.74   | 0.35 | 22.13  |
| 9.06E+09 | 8.40E+07 | 2.39E+11 | 6.76E+08 | 5.12E+09 | 0.93 | 0.28 | 12.43  | 0.35 | 35.52  |
| 3.74E+10 | 3.76E+08 | 2.43E+11 | 7.81E+08 | 1.12E+10 | 1.01 | 0.32 | 48.13  | 0.35 | 137.53 |
| 2.39E+10 | 2.48E+08 | 4.80E+11 | 1.41E+09 | 1.69E+10 | 1.04 | 0.29 | 17.60  | 0.35 | 50.29  |
| 1.09E+11 | 1.13E+09 | 2.18E+12 | 6.93E+09 | 2.34E+11 | 1.03 | 0.32 | 16.24  | 0.35 | 46.41  |
| 7.53E+10 | 7.76E+08 | 1.15E+12 | 3.67E+09 | 6.53E+10 | 1.03 | 0.32 | 21.16  | 0.35 | 60.45  |
| 1.15E+11 | 1.22E+09 | 2.06E+12 | 6.15E+09 | 1.18E+11 | 1.07 | 0.30 | 19.91  | 0.35 | 56.88  |
| 5.30E+10 | 5.64E+08 | 6.93E+11 | 2.13E+09 | 8.89E+10 | 1.06 | 0.31 | 26.52  | 0.35 | 75.78  |
| 1.07E+11 | 1.06E+09 | 2.46E+11 | 8.58E+08 | 1.15E+10 | 1.00 | 0.35 | 123.78 | 0.35 | 353.65 |

---

***Bradyrhizobium* spp. – natural enrichment under heterotrophic growth conditions**

---

|          |          |          |          |          |      |      |        |      |       |
|----------|----------|----------|----------|----------|------|------|--------|------|-------|
| 6.48E+10 | 6.45E+08 | 3.36E+11 | 1.05E+09 | 2.70E+07 | 1.00 | 0.31 | 61.58  | 1.41 | 43.67 |
| 1.29E+11 | 1.22E+09 | 5.73E+11 | 1.78E+09 | 2.43E+08 | 0.94 | 0.31 | 98.71  | 1.41 | 70.01 |
| 1.32E+11 | 1.26E+09 | 7.42E+11 | 2.17E+09 | 1.07E+08 | 0.95 | 0.29 | 88.10  | 1.41 | 62.48 |
| 1.43E+11 | 1.37E+09 | 4.41E+11 | 1.39E+09 | 2.50E+07 | 0.96 | 0.31 | 117.58 | 1.41 | 83.39 |
| 3.34E+11 | 3.15E+09 | 1.98E+12 | 4.74E+09 | 8.10E+07 | 0.94 | 0.24 | 68.23  | 1.41 | 48.39 |
| 6.19E+10 | 6.15E+08 | 2.12E+11 | 6.98E+08 | 9.32E+08 | 0.99 | 0.33 | 85.55  | 1.41 | 60.67 |
| 5.04E+10 | 5.15E+08 | 2.07E+11 | 6.25E+08 | 2.36E+09 | 1.02 | 0.30 | 54.34  | 1.41 | 38.54 |
| 5.16E+10 | 5.42E+08 | 1.49E+11 | 4.61E+08 | 2.50E+07 | 1.05 | 0.31 | 136.81 | 1.41 | 97.03 |
| 4.44E+10 | 4.34E+08 | 2.14E+11 | 6.36E+08 | 3.40E+07 | 0.98 | 0.30 | 68.59  | 4.71 | 14.56 |
| 9.60E+10 | 9.60E+08 | 4.02E+11 | 1.16E+09 | 6.80E+09 | 1.00 | 0.29 | 57.92  | 4.71 | 12.30 |
| 4.00E+11 | 3.72E+09 | 1.74E+12 | 4.49E+09 | 1.81E+08 | 0.93 | 0.26 | 66.43  | 4.71 | 14.10 |
| 2.34E+10 | 2.31E+08 | 8.71E+10 | 2.70E+08 | 2.80E+07 | 0.99 | 0.31 | 82.39  | 4.71 | 17.49 |
| 4.72E+10 | 4.37E+08 | 2.01E+11 | 8.05E+08 | 7.00E+08 | 0.93 | 0.40 | 82.74  | 4.71 | 17.57 |
| 1.74E+10 | 1.71E+08 | 3.18E+10 | 1.25E+08 | 3.50E+07 | 0.98 | 0.39 | 82.87  | 4.71 | 17.59 |

|          |          |          |          |          |      |      |        |      |       |
|----------|----------|----------|----------|----------|------|------|--------|------|-------|
| 1.67E+11 | 1.64E+09 | 1.35E+12 | 4.34E+09 | 1.08E+10 | 0.98 | 0.32 | 37.67  | 4.71 | 8.00  |
| 9.41E+09 | 1.01E+08 | 9.51E+09 | 3.50E+07 | 1.45E+08 | 1.07 | 0.37 | 288.59 | 4.71 | 61.27 |

---



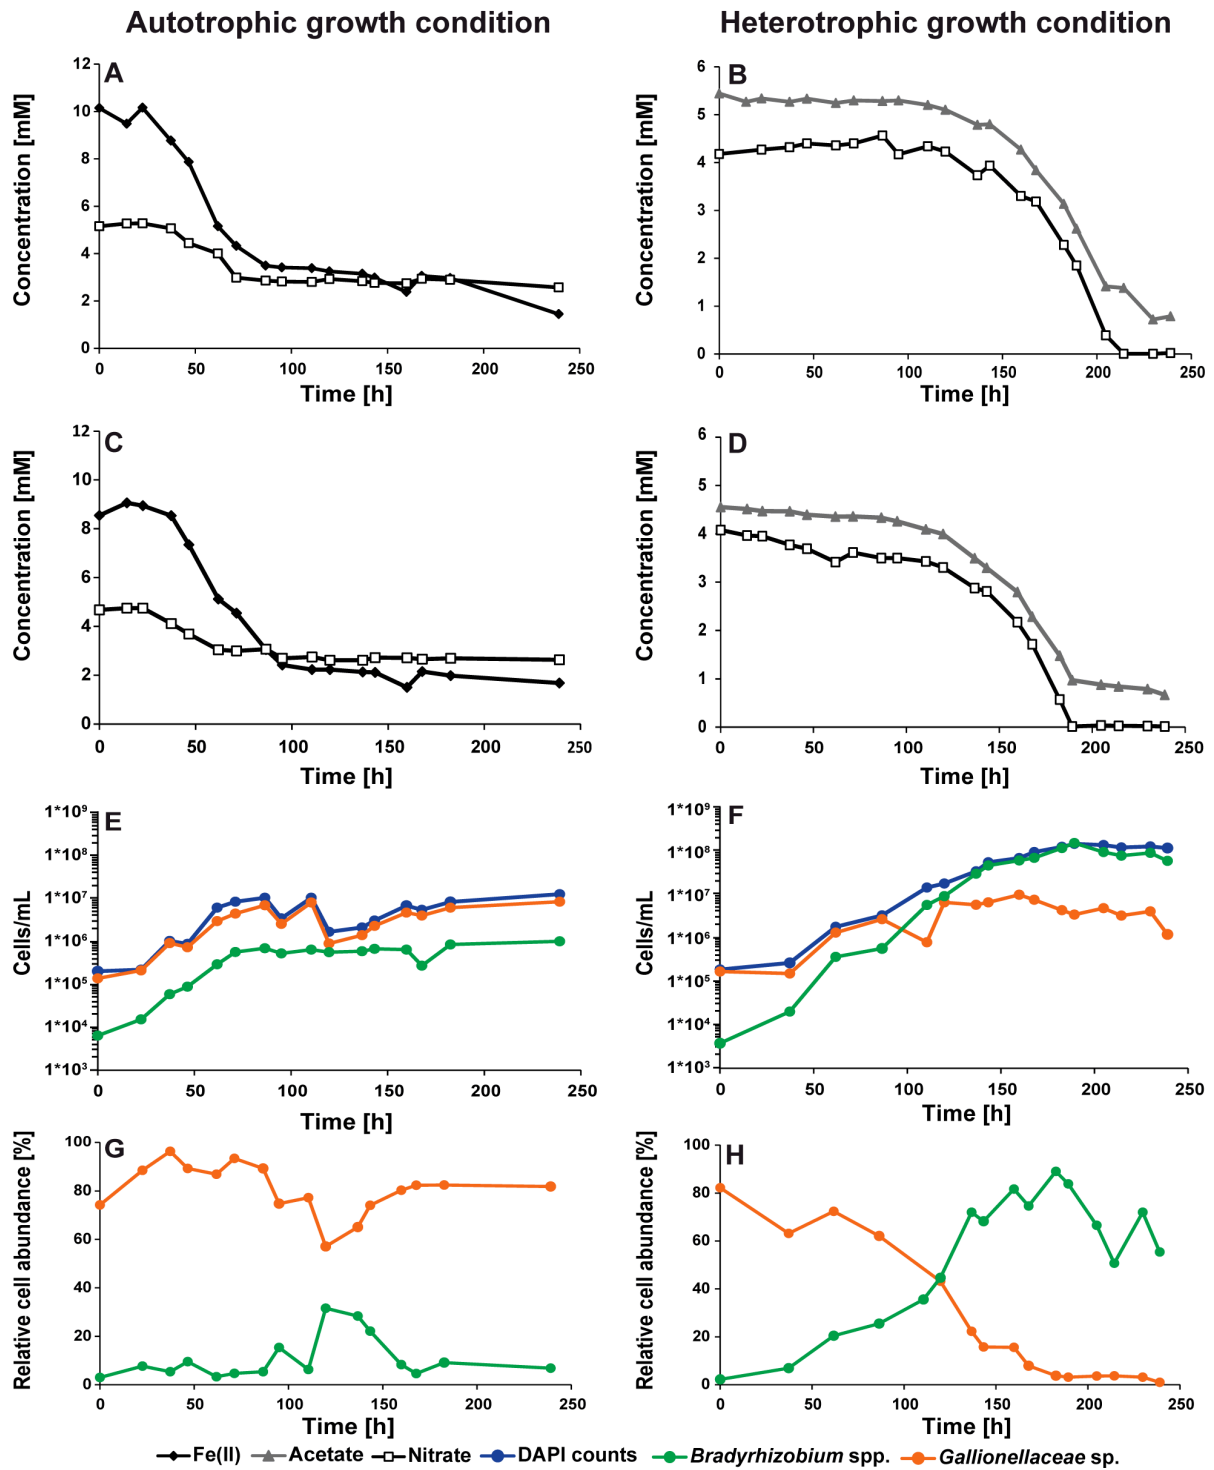

37

38 **Fig. S1:** Substrate consumption (A-D), cell growth (E-F), and relative cell abundances for the two culture  
39 KS strains *Gallionellaceae* sp. and *Bradyrhizobium* spp. (G-H) during cultivation under autotrophic (left  
40 panel) and heterotrophic (right panel) conditions. One set of data of experiments performed in  
41 duplicates is shown in C-H. The corresponding data for the second complete data set is provided in Fig.  
42 1 of the main manuscript. The third culture (A-B) was incubated without the labeled substrates and

43 used for the measurement of the natural enrichment of  $^{13}\text{C}$  and  $^{15}\text{N}$  in the cells. For this culture cell  
44 counts were not performed.

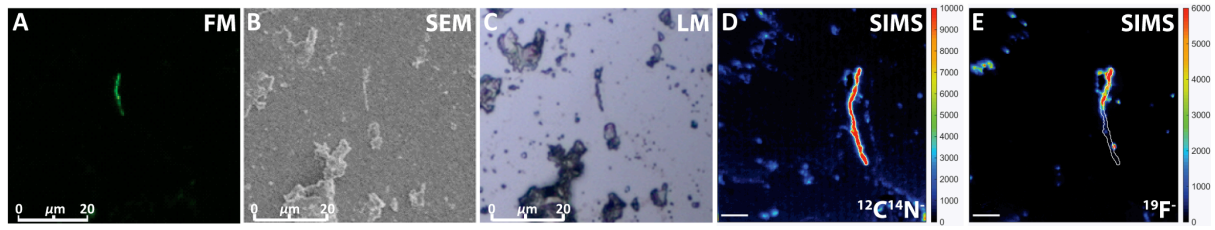

45

46 **Fig. S2:** Identification of regions of interests (ROIs). ROIs were identified based on CARD-FISH signals

47 (here: KS-Brady1249) using a fluorescence microscope (FM, A). Coordinates of these ROIs were

48 determined with light microscopy (LM, C) and Scanning Electron Microscopy (SEM) (B). CARD-FISH-

49 conferred  $^{19}\text{F}$  mass signals (E) helped to identify FISH positive cells of *Gallionellaceae* sp. and

50 *Bradyrhizobium* spp. in the mass spectrometer (D & E). Scale bars in D and E are 3  $\mu\text{m}$ .

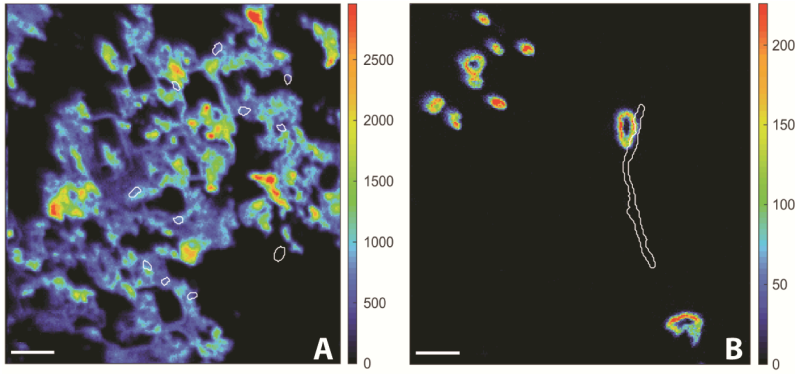

51

52 **Fig. S3:** NanoSIMS  $^{56}\text{Fe}^{16}\text{O}^-$  images of culture KS grown under autotrophic conditions with Fe(II) and  
53 nitrate (A) and heterotrophic growth conditions with acetate and nitrate (B). The white outlines  
54 indicate individual cells that have been identified and traced on the corresponding  $^{12}\text{C}^{14}\text{N}$  mass images.  
55 Scale bars are 3  $\mu\text{m}$ .

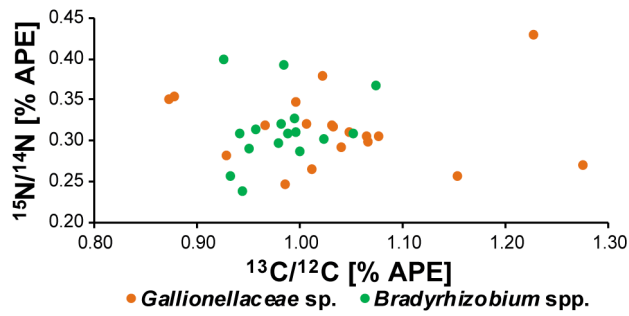

57 **Fig. S4:** Natural enrichments of  $^{13}\text{C}$  and  $^{15}\text{N}$  in *Gallionellaceae* sp. cells (orange) grown under  
 58 autotrophic conditions (Fe(II) and nitrate) and *Bradyrhizobium* spp. cells (green) grown under  
 59 heterotrophic conditions (acetate and nitrate). No isotopic-labeled substrates were added to the  
 60 medium. Measurements were done at the end of the stationary growth phase (183 h in Fig. S1A and  
 61 239 h in Fig. S1B).

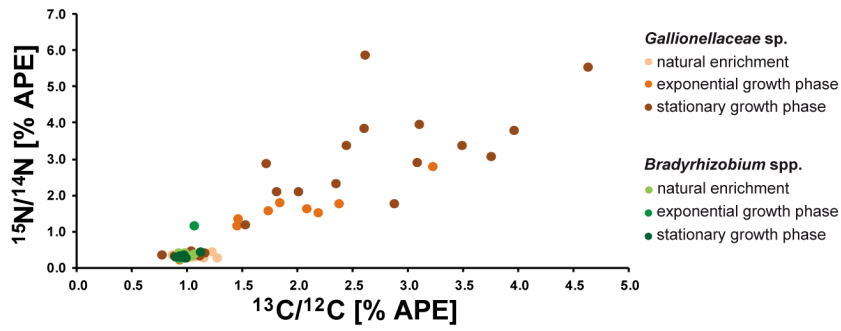

62

63 **Fig. S5:** Enrichments of  $^{13}\text{C}$  and  $^{15}\text{N}$  in *Gallionellaceae* sp. cells (orange) and *Bradyrhizobium* spp. cells  
 64 (green) during growth of culture KS under autotrophic conditions (Fe(II) and nitrate). The  
 65 corresponding growth curve is shown in Fig. 1A, C, and E of the main manuscript. Samples for the  
 66 exponential growth phase were taken at 47 h and for the stationary growth phase on 183 h (see Fig.  
 67 1). The natural enrichments are the same as shown and described in Fig. S4.

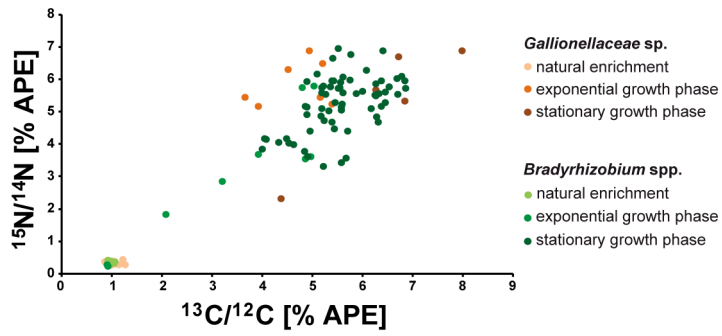

68

69 **Fig. S6:** Enrichments of  $^{13}\text{C}$  and  $^{15}\text{N}$  in *Gallionellaceae* sp. cells (orange) and *Bradyrhizobium* spp. cells  
 70 (green) during growth of culture KS under heterotrophic conditions (acetate and nitrate). The  
 71 corresponding growth curve is shown in Fig. 1B, D, and F of the main manuscript. Samples for the  
 72 exponential growth phase were taken at 183 h and for the stationary growth phase on 239 h (see Fig.  
 73 1). The natural enrichments are the same as shown and described in Fig. S4.
